# Supplementary material
Source: PubMed Central journal article supplement (PMC3203757)
Supplement: 1109597108_pnas.1109597108_SI.pdf [file 1109597108_pnas.1109597108_SI.pdf]

# Supporting Information

Ge et al. 10.1073/pnas.1109597108

## SI Text

**Selection Criteria of F-D Curves Recorded upon Unfolding of Single BetP Molecules.** WT BetP is composed of 595 aa and the longest F-D curves reproducibly recorded on WT BetP exhibited lengths ranging between 130 and 160 nm (Fig. 1B, Fig. S1). SMFS on  $\alpha$ -helical membrane proteins showed that the last force peak of such longest F-D curves detected interactions that have been established by the last terminal region remaining embedded in the membrane (1). If the AFM stylus pulls one terminal end of BetP and unfolds all stable structural segments until the opposing terminal region established the final unfolding barrier we reveal a stretched polypeptide of  $\approx 360$ –500 aa. This length of the stretched polypeptide corresponds to a pulling distance of  $\approx 130$ –180 nm. Thus, we could conclude that the 130–160 nm long F-D curves (Fig. S1) were obtained upon unfolding BetP from either one of its terminal ends. To ensure that we analyzed only BetP molecules that have been attached to the AFM stylus by their N- or C-terminal end we applied this length criterion to select the F-D curves.

**BetP Attaches Nonspecifically with the N-Terminal End to the AFM Stylus.** The force peaks of the F-D spectra (Fig. 1B, Fig. S1) reflect interactions, which have been established within the membrane protein (1). The attachment of the BetP to the AFM stylus occurred nonspecifically. Because we recorded only one characteristic F-D pattern we must assume that BetP preferentially attached with one of its terminal ends to the AFM stylus. To identify from which terminal end the nonspecific attachment of BetP occurred, we performed SMFS experiments on two shortened forms of BetP. BetP $\Delta$ C45 was a mutant lacking 45 aa of the C-terminal end and BetP $\Delta$ N exhibited a N-terminal end truncated by  $\approx 35$  aa after aminopeptidase (AP) treatment. Comparative SDS-PAGE analysis for the AP cleaved and intact BetP validated successful cleavage of the transporter (Fig. S2).

The position of the last force peak of F-D curves recorded for WT BetP and BetP $\Delta$ N allowed estimating the maximum length of their stretched polypeptides. WT BetP reconstituted into the

1-palmitoyl-2-oleoyl-phosphatidylglycerol (POPG) lipid membranes showed a last force peak at an average pulling distance of  $139 \pm 3$  nm (Fig. S3A), which fitted by the worm-like-chain (WLC) model corresponds to a  $527 \pm 11$  aa long stretched polypeptide. In contrast to WT BetP and BetP $\Delta$ C45, the average maximum length of F-D curves recorded of BetP $\Delta$ N55-60 was significantly shortened to  $495 \pm 8$  aa (Fig. S3B). The length difference of  $\approx 32$  aa matched the truncation of the N-terminal end by  $\approx 35$  aa estimated by SDS-PAGE (Fig. S2). Irrespective of its truncated N-terminal end, the unfolding spectra of BetP $\Delta$ N showed similar force peak patterns such as observed for WT BetP and BetP $\Delta$ C45 (Fig. S3). However, compared to WT BetP the positions of all major force peaks were shifted by  $\approx 32$  aa. Possible minor peaks at too close distance ( $< 15$  nm) could possibly not be detected because this pulling distance is usually masked by unspecific interactions occurring between AFM stylus and membrane (1,2). This shift of the force spectra towards shorter contour lengths leads to the conclusion that in all experiments shown in Fig. S1 and S3 the AFM stylus pulled the N-terminal end of BetP.

**Applying a Membrane Compensation to Locate Interactions within the Membrane or the Membrane Surface Opposite to the Pulling AFM Stylus.** In some cases the contour length suggested that the interaction anchoring the unfolded polypeptide was located at the membrane surface (periplasm) opposite to the pulling AFM stylus. To locate this interaction, the thickness of the membrane ( $\approx 4$  nm) was added to the measured contour length of the unfolded polypeptide. This “membrane compensation” called procedure (1, 3) adds  $\approx 11$  aa to the contour length of the unfolded polypeptide locates the interaction inside the membrane (Fig. 2). In other cases the anchor of the polypeptide had to be assumed to locate in the membrane. Depending on the location we added  $n$  aa to the contour length with  $n \cdot 0.36$  nm equals the vertical position of the anchor in the membrane.

1. Kedrov A, Janovjak H, Sapra KT, Muller DJ (2007) Deciphering molecular interactions of native membrane proteins by single-molecule force spectroscopy. *Annu Rev Biophys Biomol Struct* 36:233–260.

2. Oesterhelt F, Oesterhelt D, Pfeiffer M, Engel A, Gaub HE, Müller DJ (2000) Unfolding pathways of individual bacteriorhodopsins. *Science* 288:143–146.

3. Muller DJ, et al. (2002) Stability of bacteriorhodopsin  $\alpha$ -helices and loops analyzed by single-molecule force spectroscopy. *Biophys J* 83:3578–3588.



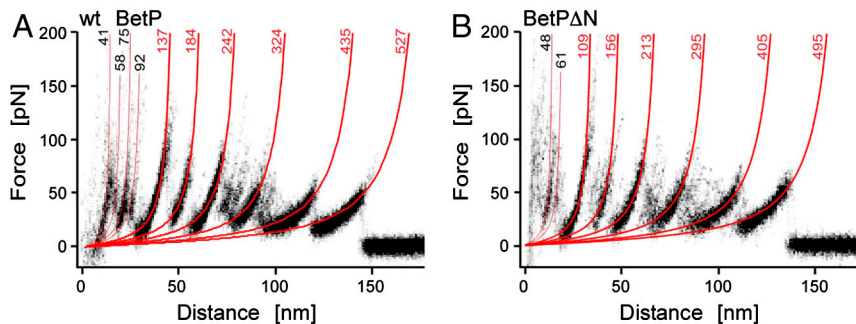

**Fig. S3.** F-D spectra of WT BetP and BetP $\Delta$ N. Superimpositions of F-D spectra recorded of WT BetP (A,  $n = 30$ ) and BetP having a truncated ( $\approx 35$  aa) N terminus (BetP $\Delta$ N) (B,  $n = 30$ ) being reconstituted in native POPG lipids. Experiments were conducted in 200 mM NaCl, 50 mM Tris-HCl, pH 7.5. Red curves represent worm-like-chain (WLC) fits of the force peaks. Every number at the upper end of a WLC fit denotes the contour length of the unfolded and stretched polypeptide (given in amino acids).

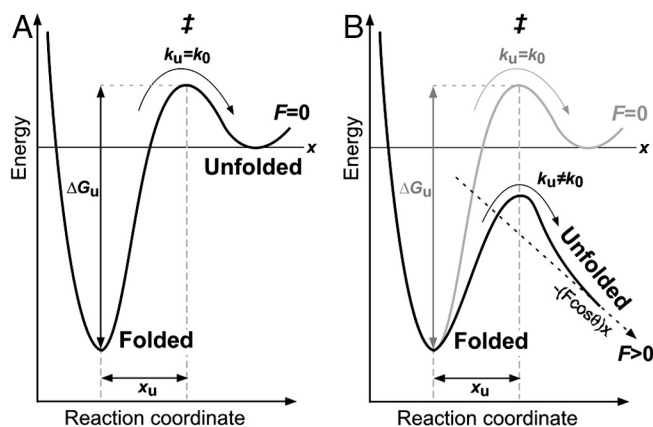

**Fig. S4.** Conceptual energy barrier describing the stability and unfolding of a protein exposed to an externally applied force. The energy barriers were adopted according to the Bell-Evans theory (1–3). (A) Two-state model describing the mechanical unfolding experiments. The energy potential exhibits one energy barrier separating the folded low-energy state from the unfolded state.  $\Delta G_u$  gives the activation energy for unfolding,  $x_u$  describes the distance from the folded to the transition state,  $\ddagger$ , and  $k_u$  gives the transition rate for crossing the energy barrier. In absence of externally applied forces the thermal transition rate equals that of equilibrium  $k_0$ . (B) Application of an external force,  $F$ , changes the thermal likelihood of reaching the top of the energy barrier. It is assumed, that the thermally averaged projection of the energy profile along the pulling direction is tilted by the mechanical energy  $(-F \cos \theta)x$  (short-dashed line) without changing the distance,  $x_u$ , of the folded state relative to the energy barrier.  $\theta$  gives the angle of the externally applied force relative to the molecular reaction coordinate  $x$ . This tilt decreases the energy barrier (black energy potential). At smaller applied forces, the thermal contribution to overcome the energy barrier is higher, and therefore, the mechanical energy required to overcome the barrier is smaller. At increasingly applied force, the lifetime of the folded state reduces.

- 1 Bell GI (1978) Models for the specific adhesion of cells to cells. *Science* 200:618–627.
- 2 Evans E, Ritchie K (1997) Dynamic strength of molecular adhesion bonds. *Biophys J* 72:1541–1555.
- 3 Evans E (2001) Probing the relation between force–lifetime–and chemistry in single molecular bonds. *Annu Rev Biophys Biomol Struct* 30:105–128.

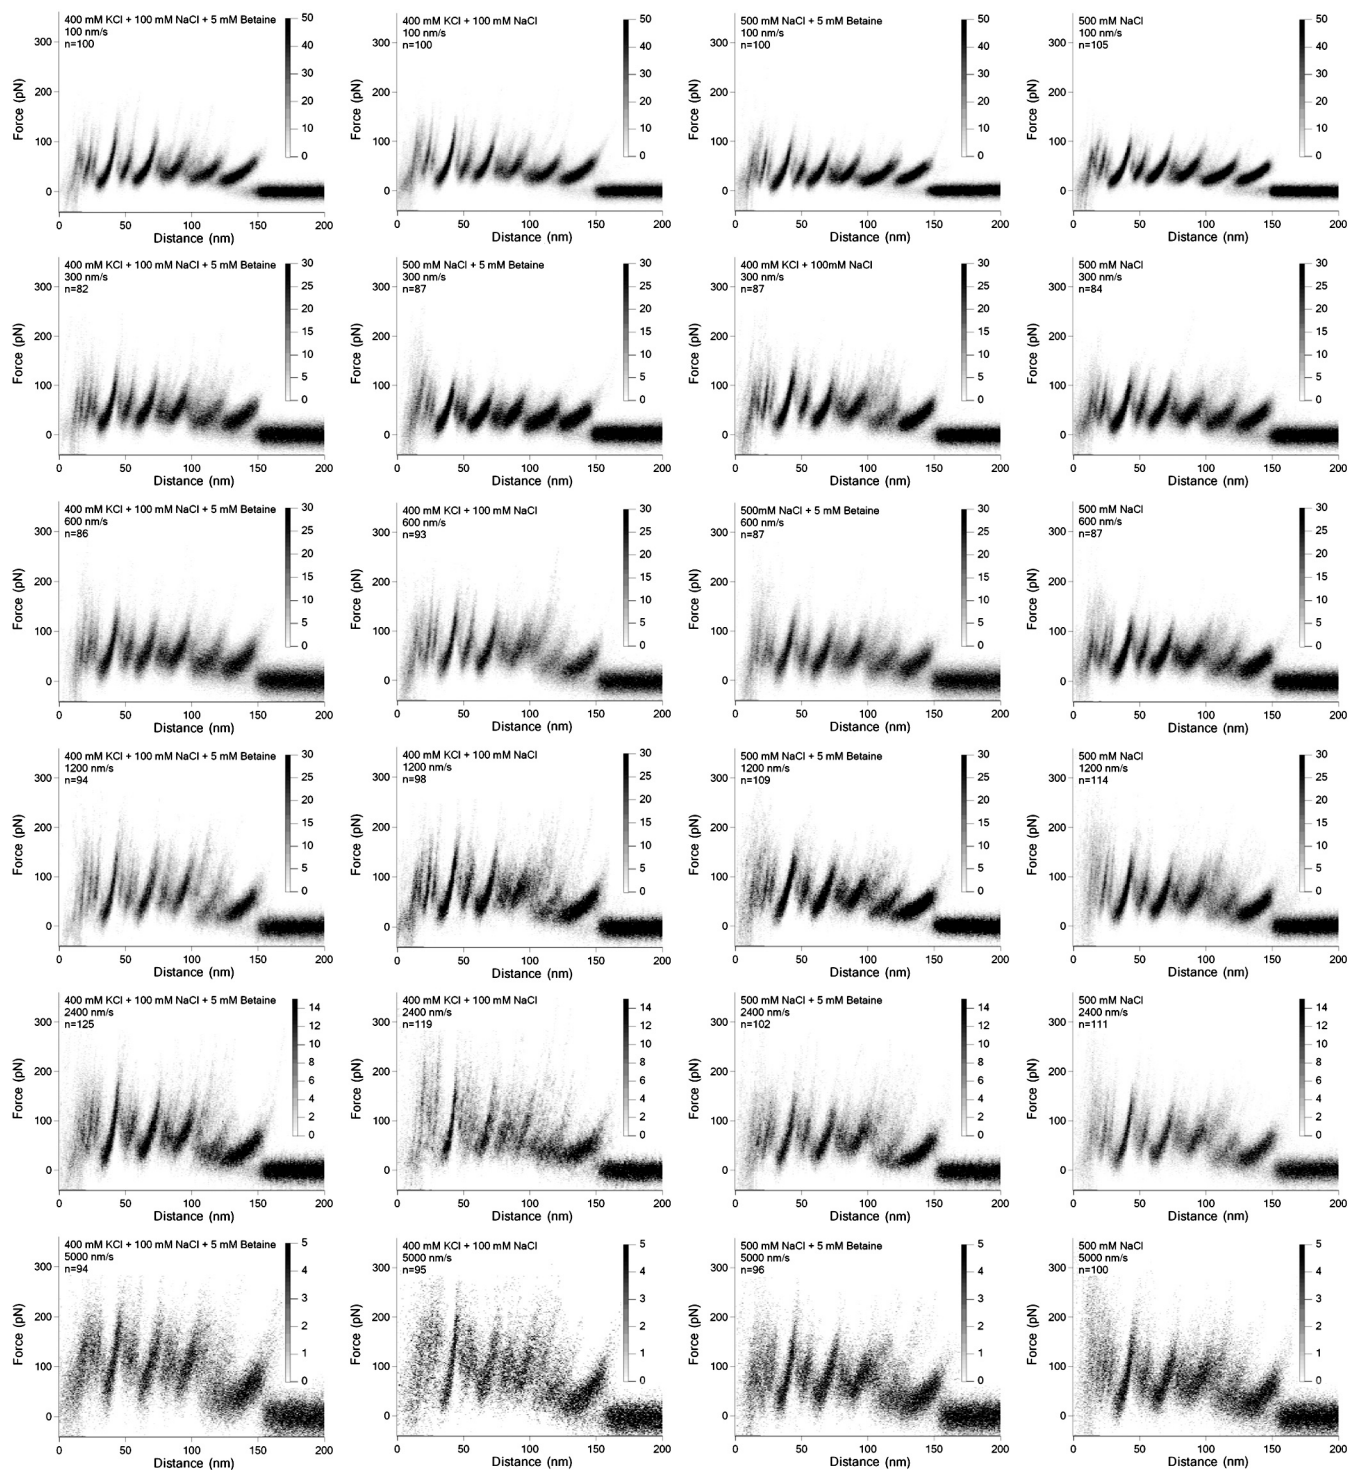

**Fig. S5.** Superimpositions of F-D curves recorded upon unfolding of WT BetP at six different pulling speeds and four different buffer solutions. Pulling speeds used to probe the interactions occurring during unfolding of single BetP molecules were 100, 300, 600, 1,200, 2,400, and 5,000 nm/s. The buffer conditions were first column (400 mM KCl, 100 mM NaCl, 5 mM betaine, 50 mM Tris-HCl, pH 7.5), second column (400 mM KCl, 100 mM NaCl, 50 mM Tris-HCl, pH 7.5), third column (500 mM NaCl, 5 mM betaine, 50 mM Tris-HCl, pH 7.5), and last column (500 mM NaCl, 50 mM Tris-HCl, pH 7.5). BetP characterized has been reconstituted into native *E. coli* lipids. *n* indicates the number of F-D curves superimposed.











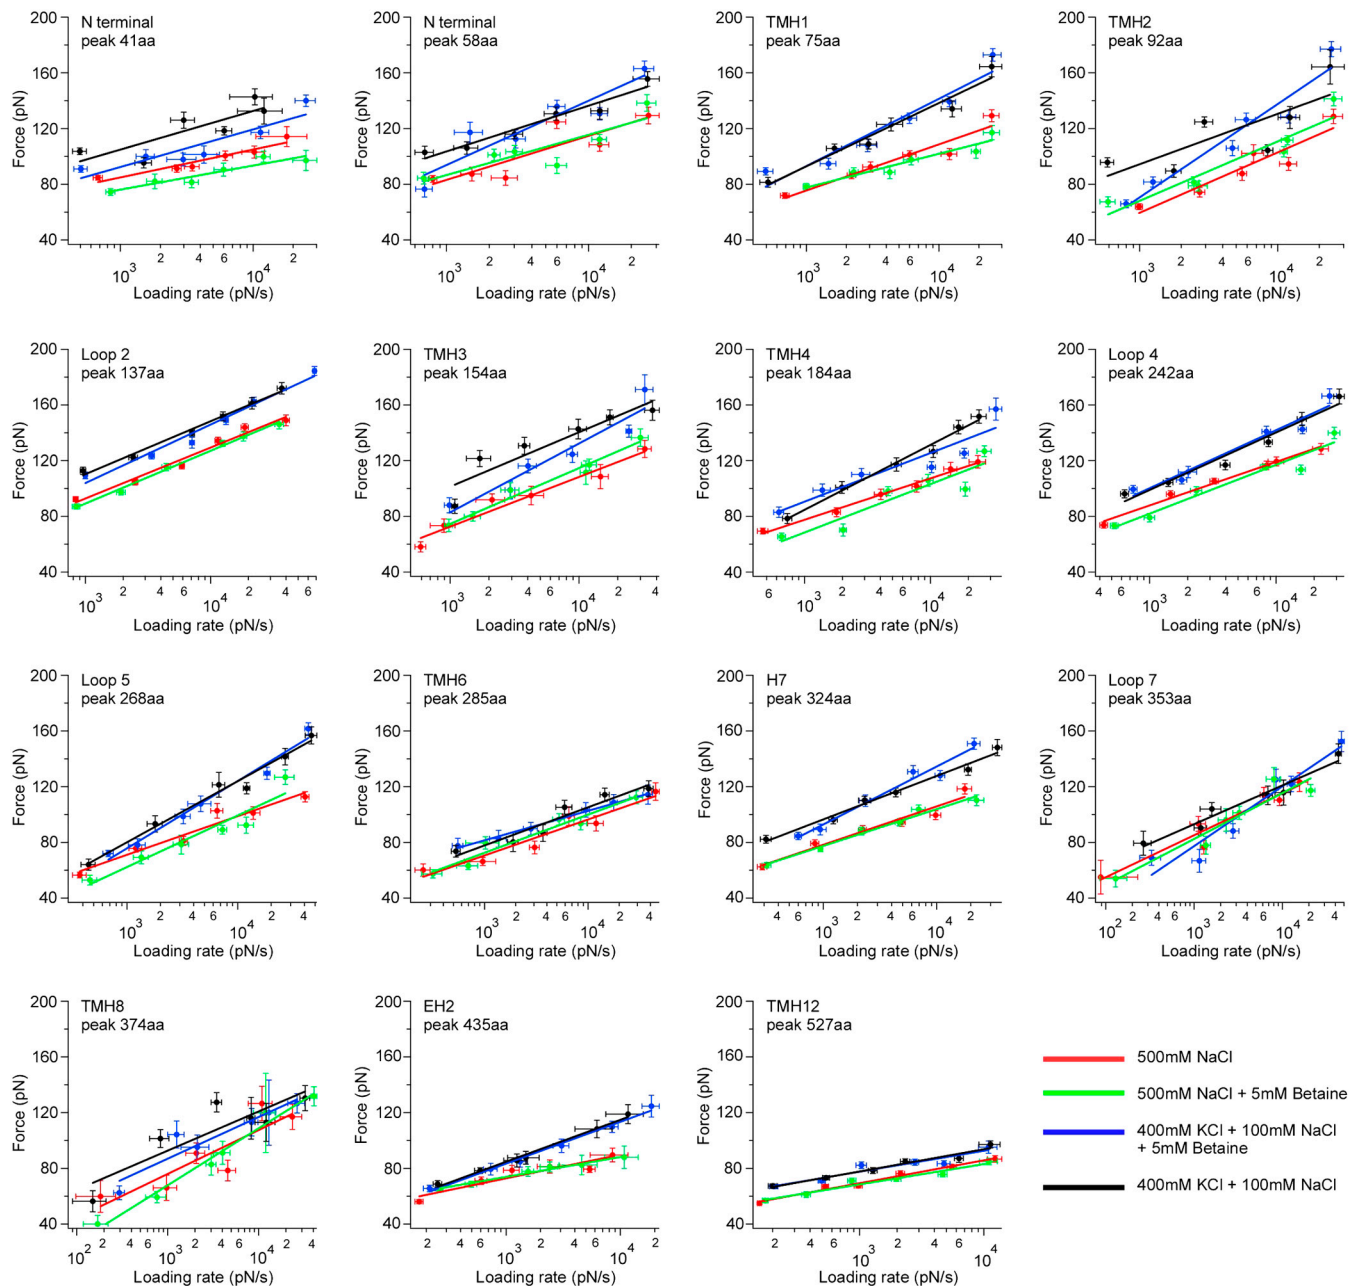

**Fig. S10.** Dynamic SMFS (DFS) spectra recorded setting BetP in a down-regulated state in absence (red) and in presence (green) of betaine, and in an up-regulated state in absence (black) and in presence of (blue) substrate. Buffer conditions were (blue) 400 mM KCl, 100 mM NaCl, 5 mM betaine, 50 mM Tris-HCl, pH 7.5, (black) 400 mM KCl, 100 mM NaCl, 50 mM Tris-HCl, pH 7.5, (green) 500 mM NaCl, 5 mM betaine, 50 mM Tris-HCl, pH 7.5, and (red) 500 mM NaCl, 50 mM Tris-HCl, pH 7.5. Shown are DFS spectra for all reproducibly occurring force peaks (interactions) as indicated in Fig. S1 and S2. Most probable forces and S.E. (error bars) of the DFS spectra were determined from the F-D curves superimposed in Fig. S5 and fits shown in Figs. S6–S9.

**Table S1. Parameters characterizing the energy barriers ( $x_u$ ,  $k_0$ , and  $\Delta G_u$ ) and spring constants ( $\kappa$ ) of stable structural regions of BetP**

| Peak position / structural region | $x_u$ (nm)   |                        |             |          | $k_0$ ( $s^{-1}$ )             |                |             |          |
|-----------------------------------|--------------|------------------------|-------------|----------|--------------------------------|----------------|-------------|----------|
|                                   | 400 mM KCl   | 400 mM KCl             | 500 mM      | 500 mM   | 400 mM KCl                     | 400 mM KCl     | 500 mM      | 500 mM   |
|                                   | 100 mM NaCl  | 100 mM NaCl            | NaCl 5 mM   | 500 mM   | 100 mM NaCl                    | 100 mM NaCl    | NaCl 5 mM   | 500 mM   |
|                                   | 5 mM betaine | no betaine (%)         | betaine (%) | NaCl (%) | 5 mM betaine                   | no betaine (%) | betaine (%) | NaCl (%) |
| 41 aa / N-terminal                | 0.35 ± 0.08  | 97                     | 156***      | 135**    | 0.03 ± 0.06                    | 43             | 16          | 21       |
| 58 aa / N-terminal                | 0.21 ± 0.04  | 141***                 | 160**       | 146**    | 0.46 ± 0.50                    | 11*            | 17          | 37       |
| 75 aa / TMH1                      | 0.20 ± 0.03  | 106                    | 199***      | 146***   | 0.56 ± 0.42                    | 82             | 11**        | 65       |
| 92 aa / TMH2                      | 0.14 ± 0.02  | 185**                  | 157***      | 155***   | 3.04 ± 1.29                    | 5***           | 45**        | 74       |
| 137 aa / Loop2★                   | 0.23 ± 0.02  | 110**                  | 111**       | 115**    | 0.18 ± 0.11                    | 41**           | 146         | 99       |
| 154 aa / TMH3                     | 0.19 ± 0.03  | 127*                   | 123**       | 139***   | 0.97 ± 0.75                    | 15**           | 81          | 61       |
| 184 aa / TMH4★                    | 0.27 ± 0.05  | 75**                   | 101         | 117*     | 0.17 ± 0.22                    | 447***         | 422         | 113      |
| 242 aa / TMH5★                    | 0.23 ± 0.03  | 101                    | 119**       | 133***   | 0.22 ± 0.15                    | 103            | 140         | 52       |
| 268 aa / Loop5                    | 0.20 ± 0.01  | 110**                  | 131***      | 174***   | 1.30 ± 0.43                    | 61**           | 100         | 18***    |
| 285 aa / TMH6                     | 0.45 ± 0.02  | 77***                  | 77***       | 82***    | 0.02 ± 0.01                    | 781*           | 1,219**     | 1,060**  |
| 324 aa / H7★                      | 0.23 ± 0.02  | 133***                 | 158***      | 151***   | 0.32 ± 0.16                    | 18***          | 31***       | 37**     |
| 353 aa / Loop7                    | 0.22 ± 0.03  | 154***                 | 130**       | 142***   | 0.85 ± 0.61                    | 4***           | 26**        | 13**     |
| 374 aa / TMH8                     | 0.32 ± 0.06  | 106                    | 73***       | 95       | 0.10 ± 0.12                    | 43             | 1,291***    | 295      |
| 435 aa / EH2★                     | 0.32 ± 0.02  | 100                    | 211***      | 176***   | 0.13 ± 0.04                    | 92             | 1***        | 6***     |
| 527 aa / TMH12★                   | 0.63 ± 0.10  | 94                     | 103         | 91       | (1.1 ± 1.9) × 10 <sup>-3</sup> | 183            | 303         | 808***   |
|                                   |              | $\Delta G$ ( $k_B T$ ) |             |          | $\kappa$ (N/m)                 |                |             |          |
| Peak position / structural region | 400 mM KCl   | 400 mM KCl             | 500 mM      | 500 mM   | 400 mM KCl                     | 400 mM KCl     | 500 mM      | 500 mM   |
|                                   | 100 mM NaCl  | 100 mM NaCl            | NaCl 5 mM   | 500 mM   | 100 mM NaCl                    | 100 mM NaCl    | NaCl 5 mM   | 500 mM   |
|                                   | 5 mM betaine | no betaine (%)         | betaine (%) | NaCl (%) | 5 mM betaine                   | no betaine (%) | betaine (%) | NaCl (%) |
| 41 aa / N-terminal                | 24 ± 1.9     | 104                    | 108         | 107      | 1.60 ± 0.86                    | 109            | 44**        | 59       |
| 58 aa / N-terminal                | 22 ± 1.1     | 110***                 | 108         | 105      | 4.17 ± 1.92                    | 56*            | 42**        | 49*      |
| 75 aa / TMH1                      | 21 ± 0.7     | 101                    | 111***      | 102      | 4.52 ± 1.51                    | 90             | 28***       | 48***    |
| 92 aa / TMH2                      | 20 ± 0.4     | 115**                  | 104*        | 101      | 8.03 ± 2.33                    | 34***          | 42***       | 42***    |
| 137 aa / Loop2★                   | 22 ± 0.6     | 104**                  | 98          | 100      | 3.60 ± 0.70                    | 85             | 80**        | 76**     |
| 154 aa / TMH3                     | 21 ± 0.8     | 109**                  | 101         | 102      | 4.61 ± 1.62                    | 68***          | 66*         | 53**     |
| 184 aa / TMH4★                    | 23v1.3       | 93**                   | 94*         | 99       | 2.50 ± 1.10                    | 166            | 93          | 72       |
| 242 aa / TMH5★                    | 22 ± 0.7     | 100                    | 99          | 103*     | 3.52 ± 0.90                    | 98             | 70**        | 59***    |
| 268 aa / Loop5                    | 20 ± 0.3     | 102**                  | 100         | 108***   | 4.36 ± 0.73                    | 84             | 59***       | 36***    |
| 285 aa / TMH6                     | 25 ± 0.4     | 92***                  | 90***       | 91***    | 1.02 ± 0.11                    | 153**          | 150**       | 134*     |
| 324 aa / H7★                      | 22 ± 0.5     | 108***                 | 105***      | 105**    | 3.44 ± 0.68                    | 61***          | 42***       | 46***    |
| 353 aa / Loop7                    | 21 ± 0.7     | 115***                 | 106**       | 110***   | 3.51 ± 1.15                    | 48***          | 63**        | 54**     |
| 374 aa / TMH8                     | 23 ± 1.3     | 104                    | 89***       | 95       | 1.88 ± 0.76                    | 92             | 166***      | 106      |
| 435 aa / EH2★                     | 23 ± 0.3     | 100                    | 121***      | 113***   | 1.87 ± 0.22                    | 101            | 27***       | 36***    |
| 527 aa / TMH12★                   | 28 ± 1.8     | 98                     | 96          | 92**     | 0.57 ± 0.22                    | 110            | 90          | 111      |

Average values are shown for the energy barriers that stabilize structural segments of up-regulated BetP in the presence of substrate (400 mM KCl, 100 mM NaCl, 5 mM betaine, 50 mM Tris-HCl, pH 7.5). Relative to this reference values we give the percentage of the values reached for up-regulated BetP in the absence of substrate (400 mM KCl, 100 mM NaCl, 50 mM Tris-HCl, pH 7.5), and for down-regulated BetP in the absence (500 mM NaCl, 50 mM Tris-HCl, pH 7.5), and presence (500 mM NaCl, 5 mM betaine, 50 mM Tris-HCl, pH 7.5) of substrate. Differences compared to BetP characterized in 400 mM KCl, 100 mM NaCl, 5 mM betaine, 50 mM Tris-HCl, at pH 7.5 were considered being significant (printed in bold) when  $p$ -values approached <0.05 (\*\*), and <0.01 (\*\*\*) from T-student tests (Table S2) and their changes did not overlap within their standard deviations given in Table 1. Black star denote major force peaks that became dominant in superimposed F-D curves. Barrier heights,  $\Delta G_u$ , and spring constants,  $\kappa$ , were calculated as described under *Calculation of Transition Barrier Heights and Rigidity* in the main text. Values that showed a significant difference are highlighted in bold. Errors of  $x_u$  and  $k_0$  represent S.D. Errors in  $\Delta G_u$  were estimated by propagating the errors of  $k_0$ . Errors in  $\kappa$  were estimated by propagating the errors of  $\Delta G_u$  and  $k_0$ .

**Table S2. Significance tests of the parameters characterizing the energy barriers ( $x_u$ ,  $k_0$ , and  $\Delta G_u$ ) and spring constants ( $\kappa$ ) of stable structural regions of BetP shown in Table S1**

| Peak position / structural region | $x_u$ (nm)                  |                           |                             |                            | $k_0$ ( $s^{-1}$ )                        |                                         |                             |                            |
|-----------------------------------|-----------------------------|---------------------------|-----------------------------|----------------------------|-------------------------------------------|-----------------------------------------|-----------------------------|----------------------------|
|                                   | 400 mM KCl                  |                           | 500 mM NaCl                 |                            | 400 mM KCl                                |                                         | 500 mM NaCl                 |                            |
|                                   | 400 M NaCl<br>5 mM betaine  | 100 mM NaCl<br>no betaine | 500 mM NaCl<br>5 mM betaine | 500 mM NaCl<br>500 mM NaCl | 400 mM KCl<br>100 mM NaCl<br>5 mM betaine | 400 mM KCl<br>100 mM NaCl<br>no betaine | 500 mM NaCl<br>5 mM betaine | 500 mM NaCl<br>500 mM NaCl |
| 41 aa / N-terminal                | 1                           | 0.872847                  | 0.00329716                  | 0.0200222                  | 1                                         | 0.552632                                | 0.311047                    | 0.336676                   |
| 58 aa / N-terminal                | 1                           | 0.00391558                | 0.0155549                   | 0.0357694                  | 1                                         | 0.0711115                               | 0.106877                    | 0.257572                   |
| 75 aa / TMH1                      | 1                           | 0.446525                  | 3.43756e-05                 | 0.00170222                 | 1                                         | 0.625326                                | 0.0162169                   | 0.382327                   |
| 92 aa / TMH2                      | 1                           | 0.0186122                 | 0.00114362                  | 0.00169552                 | 1                                         | 0.000395443                             | 0.0356449                   | 0.381007                   |
| 137 aa / Loop2★                   | 1                           | 0.031082                  | 0.0185714                   | 0.0168463                  | 1                                         | 0.0419614                               | 0.137326                    | 0.978398                   |
| 154 aa / TMH3                     | 1                           | 0.0587725                 | 0.0115944                   | 0.00147452                 | 1                                         | 0.0266633                               | 0.586397                    | 0.278611                   |
| 184 aa / TMH4★                    | 1                           | 0.010577                  | 0.965546                    | 0.0579745                  | 1                                         | 0.00103535                              | 0.141643                    | 0.812225                   |
| 242 aa / TMH5★                    | 1                           | 0.880703                  | 0.0315657                   | 0.000104753                | 1                                         | 0.93943                                 | 0.45119                     | 0.136312                   |
| 268 aa / Loop5                    | 1                           | 0.0470949                 | 0.00601876                  | 1.14471e-05                | 1                                         | 0.0398214                               | 0.997074                    | 0.000223172                |
| 285 aa / TMH6                     | 1                           | 0.00131506                | 0.000257939                 | 0.00541371                 | 1                                         | 0.0806264                               | 0.011365                    | 0.0441368                  |
| 324 aa / H7★                      | 1                           | 6.0364e-05                | 1.83946e-06                 | 7.43703e-05                | 1                                         | 0.00245037                              | 0.00822501                  | 0.0215358                  |
| 353 aa / Loop7                    | 1                           | 0.000155937               | 0.0171738                   | 0.00173648                 | 1                                         | 0.00816458                              | 0.0370472                   | 0.0148292                  |
| 374 aa / TMH8                     | 1                           | 0.649048                  | 0.00490199                  | 0.702561                   | 1                                         | 0.392479                                | 3.16416e-05                 | 0.340131                   |
| 435 aa / EH2★                     | 1                           | 0.899677                  | 6.5664e-09                  | 0.000253598                | 1                                         | 0.672154                                | 2.66385e-05                 | 5.68332e-05                |
| 527 aa / TMH12★                   | 1                           | 0.460586                  | 0.709747                    | 0.246565                   | 1                                         | 0.465698                                | 0.218655                    | 0.00871962                 |
| Peak position / structural region | $\Delta G$ ( $k_B T$ )      |                           |                             |                            | $\kappa$ (N/m)                            |                                         |                             |                            |
|                                   | 400 mM KCl                  |                           | 500 mM NaCl                 |                            | 400 mM KCl                                |                                         | 500 mM NaCl                 |                            |
|                                   | 100 mM NaCl<br>5 mM betaine | 100 mM NaCl<br>no betaine | 500 mM NaCl<br>5 mM betaine | 500 mM NaCl<br>500 mM NaCl | 400 mM KCl<br>100 mM NaCl<br>5 mM betaine | 400 mM KCl<br>100 mM NaCl<br>no betaine | 500 mM NaCl<br>5 mM betaine | 500 mM NaCl<br>500 mM NaCl |
| 41 aa / N-terminal                | 1                           | 0.569673                  | 0.128365                    | 0.14809                    | 1                                         | 0.827231                                | 0.036602                    | 0.110445                   |
| 58 aa / N-terminal                | 1                           | 0.0033091                 | 0.105268                    | 0.28841                    | 1                                         | 0.0507205                               | 0.0260658                   | 0.0508724                  |
| 75 aa / TMH1                      | 1                           | 0.613757                  | 0.00387011                  | 0.380352                   | 1                                         | 0.539406                                | 0.000495018                 | 0.00651126                 |
| 92 aa / TMH2                      | 1                           | 0.0207214                 | 0.0545875                   | 0.40868                    | 1                                         | 0.00311245                              | 0.00175753                  | 0.00192303                 |
| 137 aa / Loop2★                   | 1                           | 0.0130337                 | 0.180852                    | 0.978394                   | 1                                         | 0.131969                                | 0.0400688                   | 0.0351838                  |
| 154 aa / TMH3                     | 1                           | 0.0172623                 | 0.561772                    | 0.227815                   | 1                                         | 0.133088                                | 0.0507517                   | 0.0122016                  |
| 184 aa / TMH4★                    | 1                           | 0.0193368                 | 0.0660209                   | 0.821897                   | 1                                         | 0.00795724                              | 0.777115                    | 0.156353                   |
| 242 aa / TMH5★                    | 1                           | 0.939566                  | 0.437348                    | 0.0714028                  | 1                                         | 0.888186                                | 0.0441575                   | 0.00296091                 |
| 268 aa / Loop5                    | 1                           | 0.0382754                 | 0.99707                     | 0.000603862                | 1                                         | 0.108036                                | 0.00309386                  | 1.08222e-05                |
| 285 aa / TMH6                     | 1                           | 0.00164721                | 2.76865e-05                 | 0.000270471                | 1                                         | 0.0388362                               | 0.0136054                   | 0.0904623                  |
| 324 aa / H7★                      | 1                           | 0.000137275               | 0.00217928                  | 0.0236687                  | 1                                         | 0.00131706                              | 5.36383e-05                 | 0.000195871                |
| 353 aa / Loop7                    | 1                           | 5.76043e-05               | 0.020488                    | 0.0016462                  | 1                                         | 0.00475394                              | 0.0466903                   | 0.0121828                  |
| 374 aa / TMH8                     | 1                           | 0.424526                  | 0.000666426                 | 0.214952                   | 1                                         | 0.773996                                | 0.00707222                  | 0.861399                   |
| 435 aa / EH2★                     | 1                           | 0.670857                  | 7.62681e-08                 | 0.00290417                 | 1                                         | 0.871118                                | 7.08404e-08                 | 1.56891e-05                |
| 527 aa / TMH12★                   | 1                           | 0.501255                  | 0.231732                    | 0.0242589                  | 1                                         | 0.602909                                | 0.61304                     | 0.551752                   |

Values shown are p-values revealed from T-student tests of parameters given in Table 1.
